# Supplementary material
Source: Springer Nature journal article supplement (https://www.springermedizin.de/resource/supplementary/13012_2013_733_MOESM4_ESM.pdf/9630560)
Supplement: MOESM4 [file 9630560]

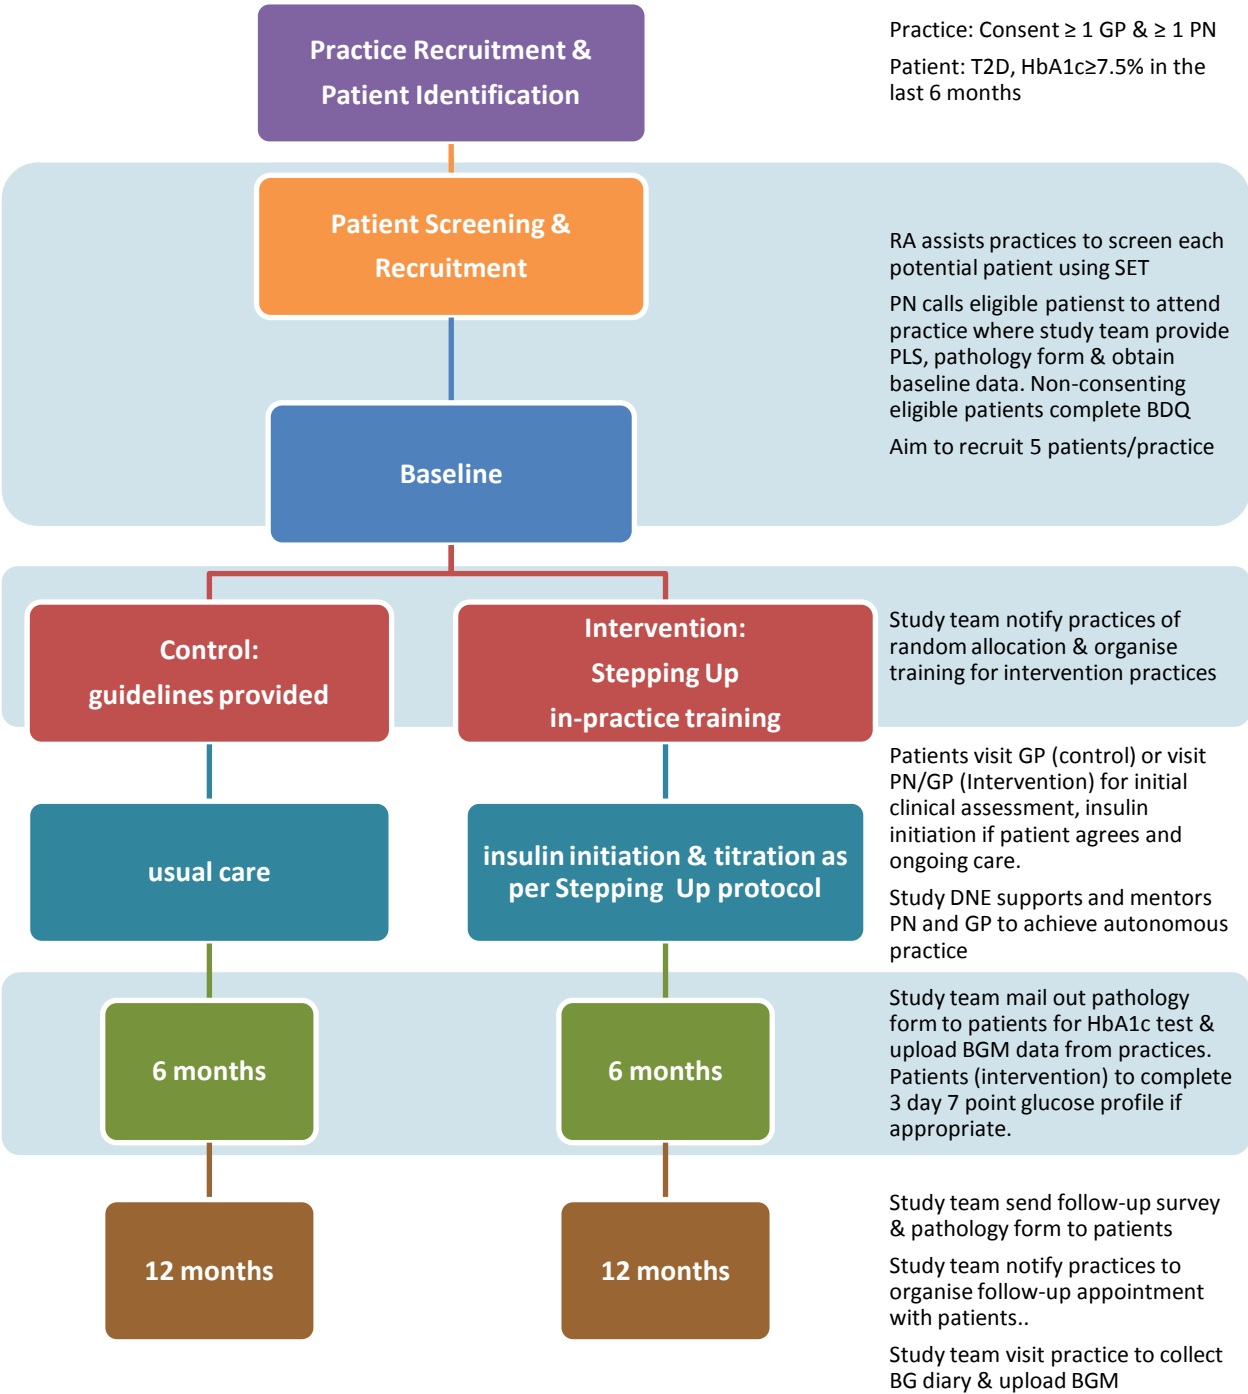

- Legend**
- T2D= Type 2 Diabetes
  - RA= Research Assistant
  - SET = Screening Eligibility Tool
  - PLS = Plain Language Statement
  - BDQ = Brief Demographic Questionnaire
  - BG= Blood Glucose
  - BGM = Blood Glucose Meter
  - GP = General Practitioner
  - PN = Practice Nurse
  - DNE = Diabetes Nurse Educator
